# Supplementary material
Source: PubMed Central journal article supplement (PMC6726553)
Supplement: NIHMS1533575-supplement-5.pdf [file NIHMS1533575-supplement-5.pdf]

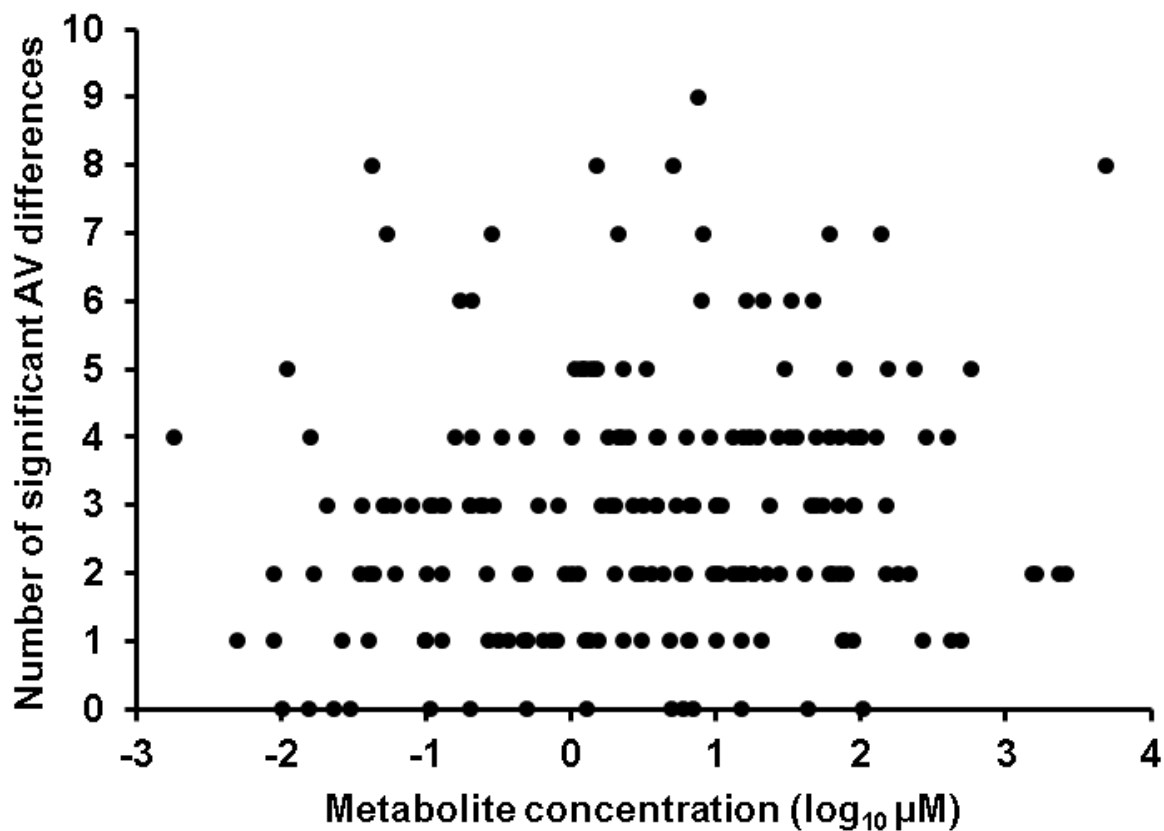

**Figure S1.** The correlation between the number of significant AV differences detected per metabolite and the metabolite's absolute concentration. Related to Fig.1.

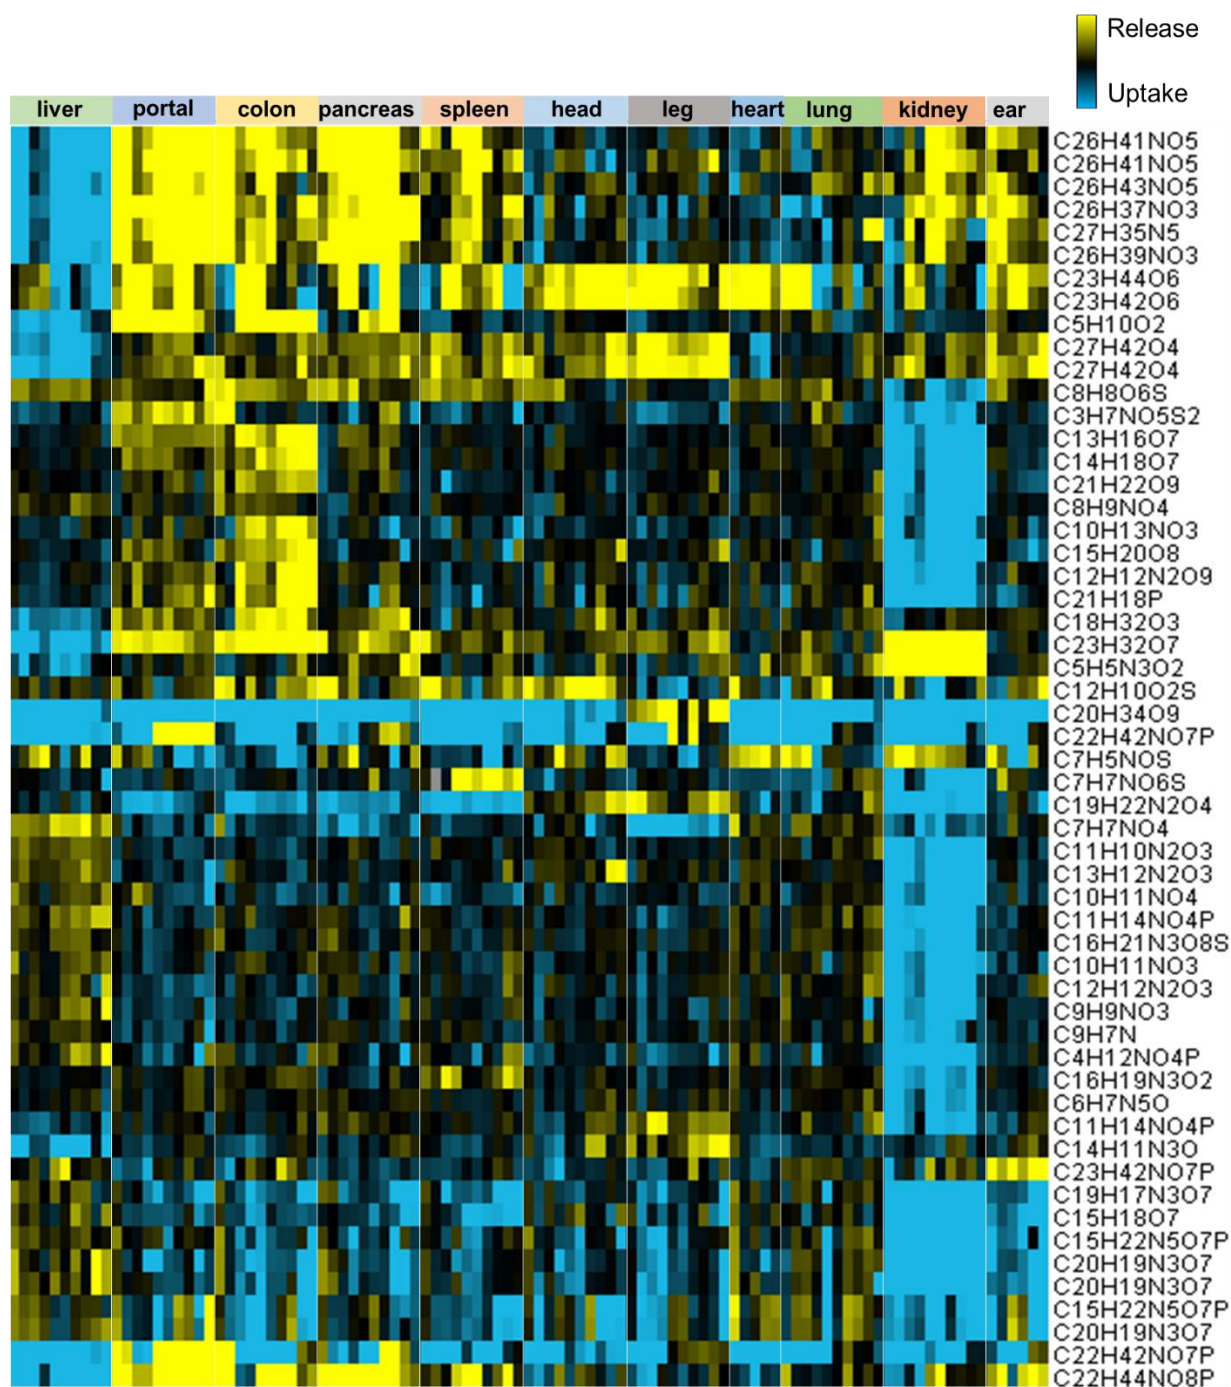

Figure S2. Unknown metabolites showing significant inter-organ exchange. Related to Fig.1.

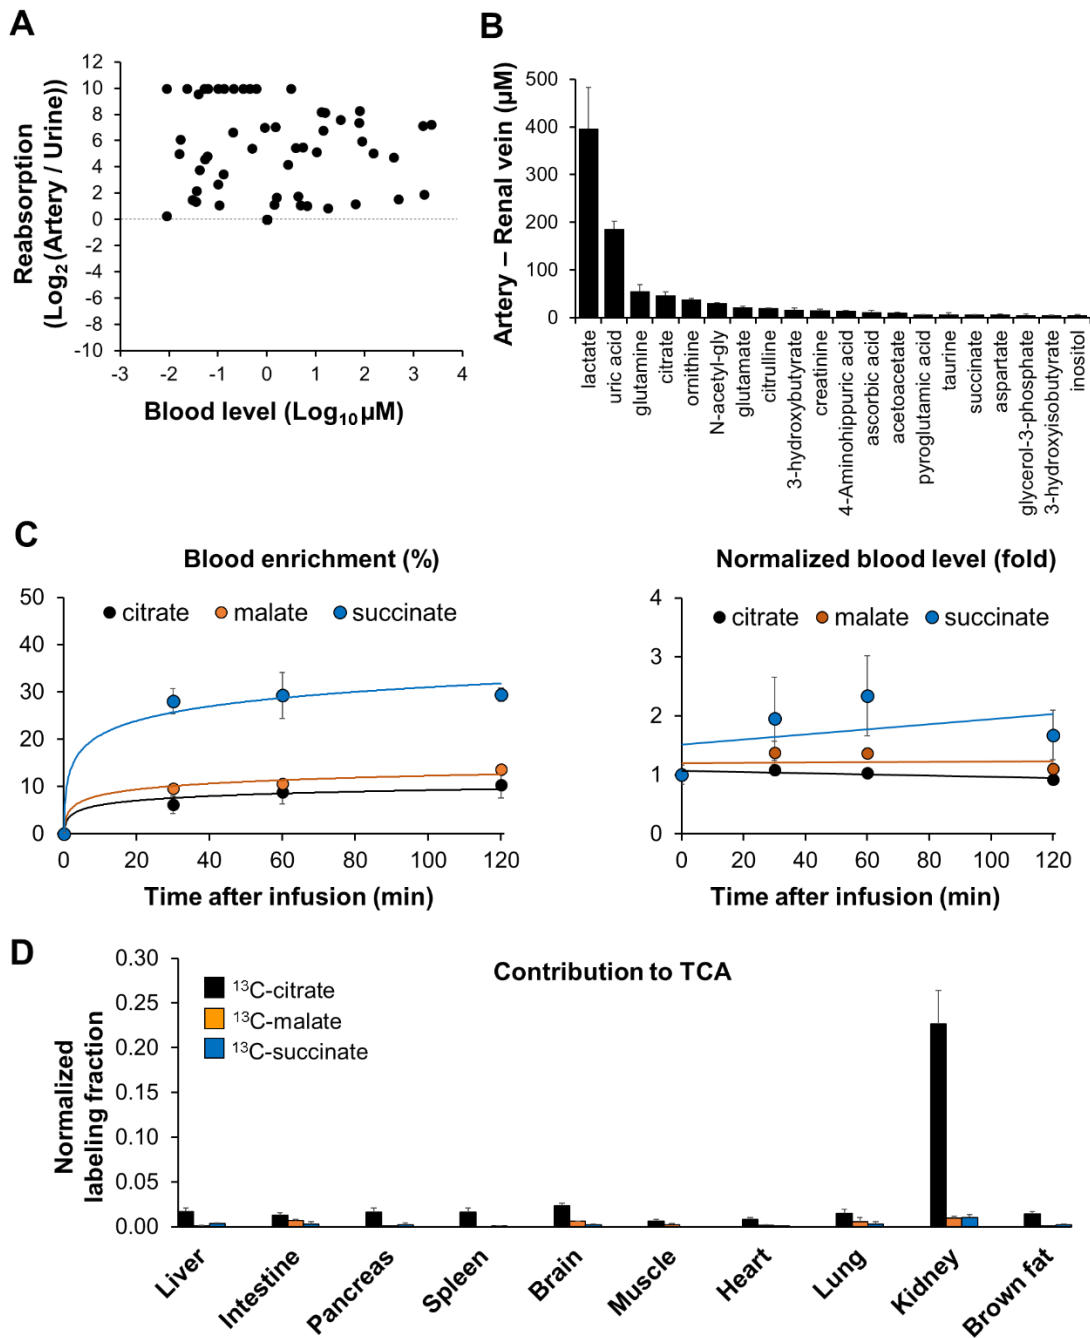

**Figure S3. Renal metabolite uptake in pigs (A and B) and steady-state infusion of  $^{13}\text{C}$ -labeled TCA intermediate tracers in mice (C and D).** The reporter metabolite (measured to determine TCA labeling) was selected to be distinct from the tracer metabolite, to avoid misinterpreting extracellular tracer as TCA labeling (in practice, we observe an additional 1% to 8% TCA contribution, depending on the tissue, when the reporter metabolite and tracer are the same). Specifically, for  $^{13}\text{C}$ -citrate and  $^{13}\text{C}$ -malate infusions, tissue succinate labeling was used to determine their TCA contribution. For  $^{13}\text{C}$ -succinate infusion, tissue malate labeling was used. Data are means and error bars are standard errors. N = 4 for citrate, and N = 3 for malate and succinate. Related to Fig.2.

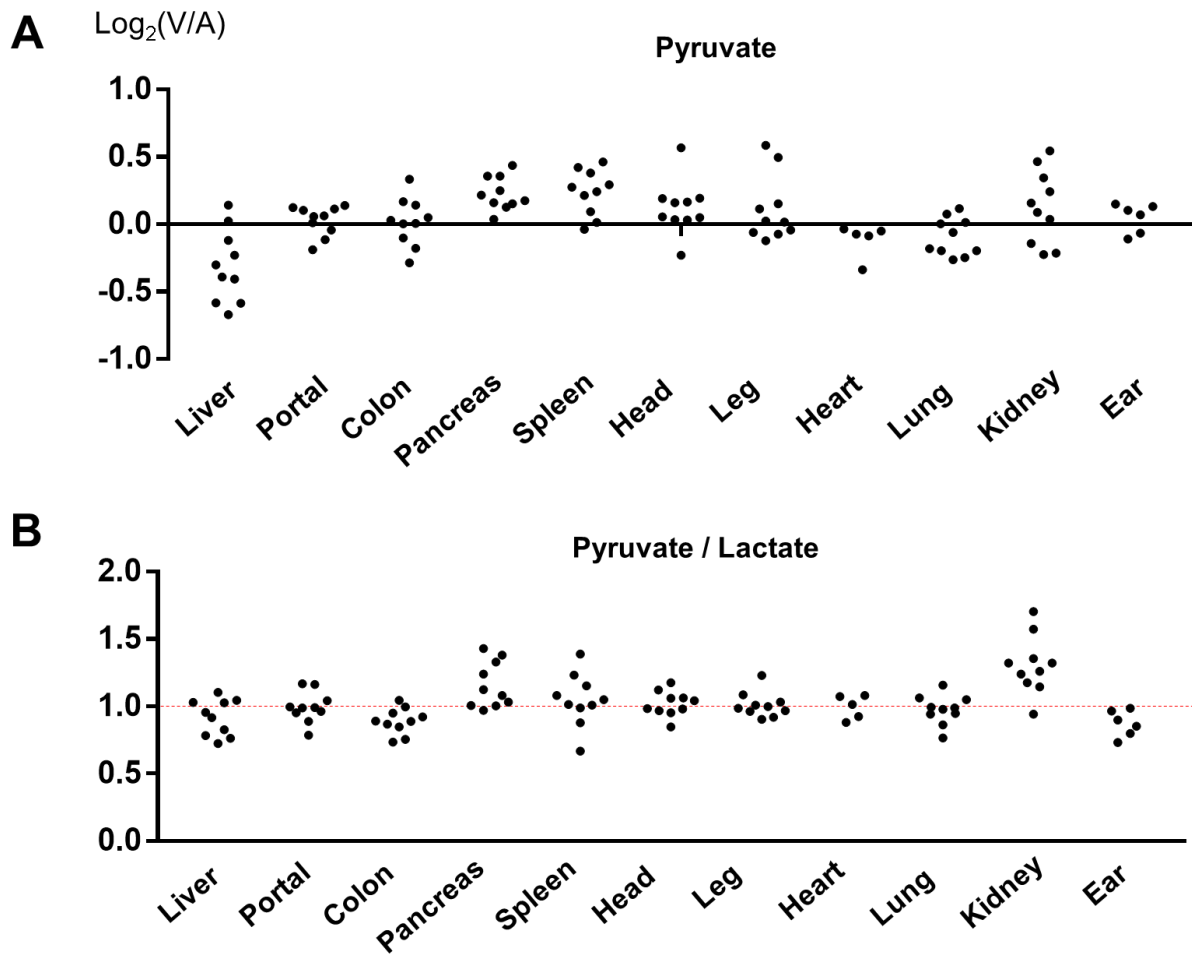

**Figure S4. Kidneys oxidize circulating lactate into circulating pyruvate in pigs.** Related to Fig. 3.

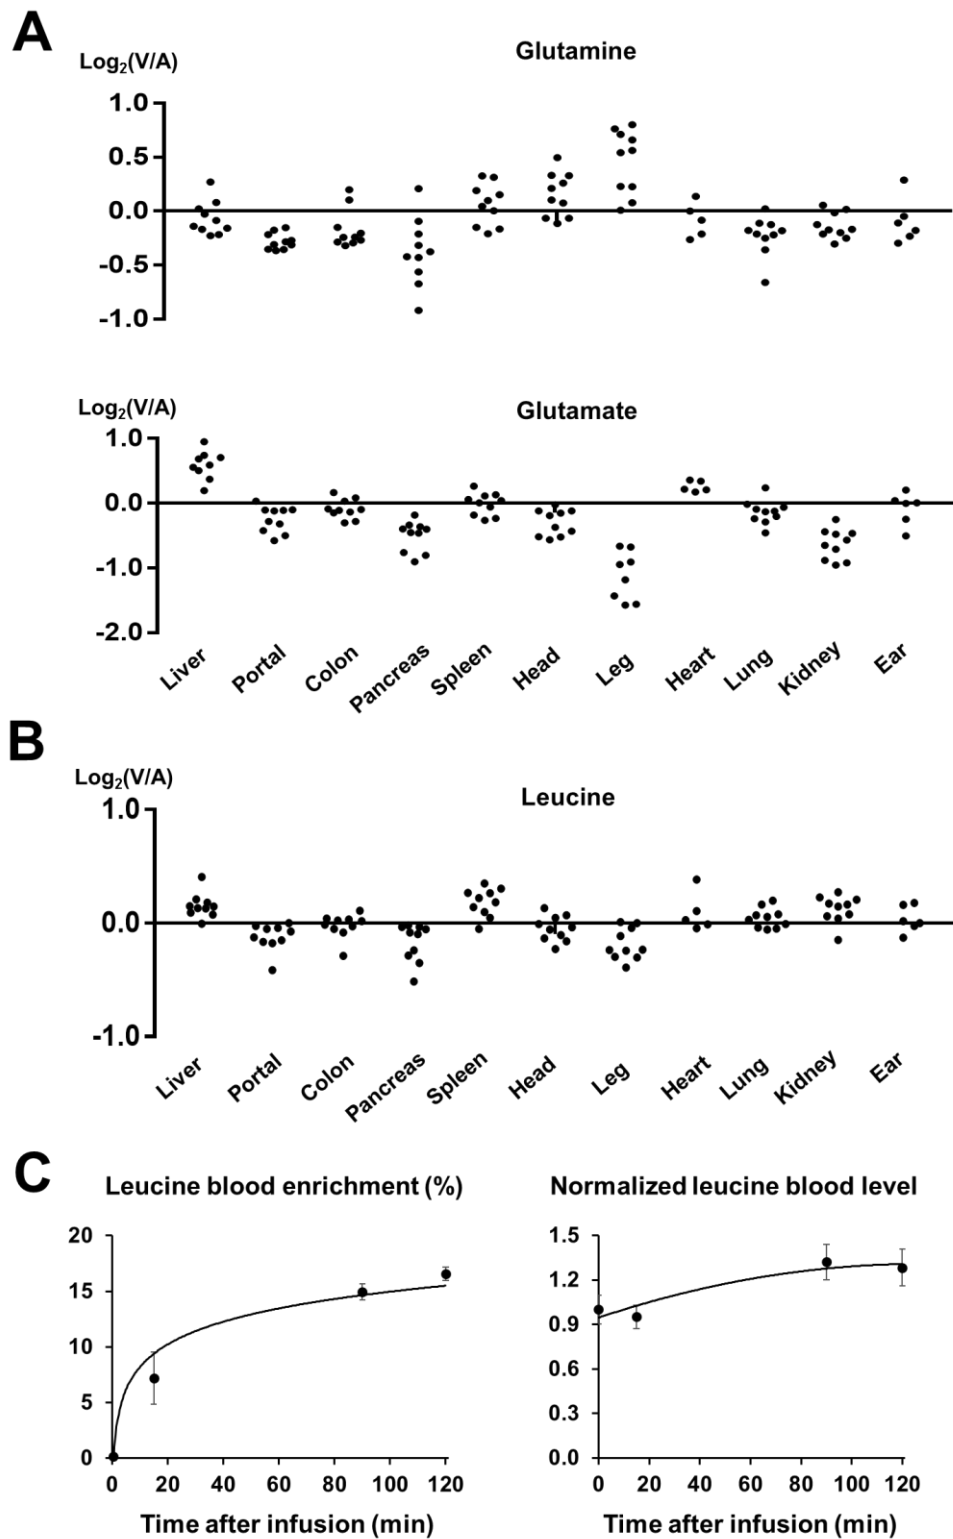

**Figure S5. Exchange of amino acids in pigs (A and B), and steady-state infusion of a <sup>13</sup>C-leucine tracer in mice (C). Data are means and error bars are standard errors (N = 4 mice). Related to Fig. 4.**

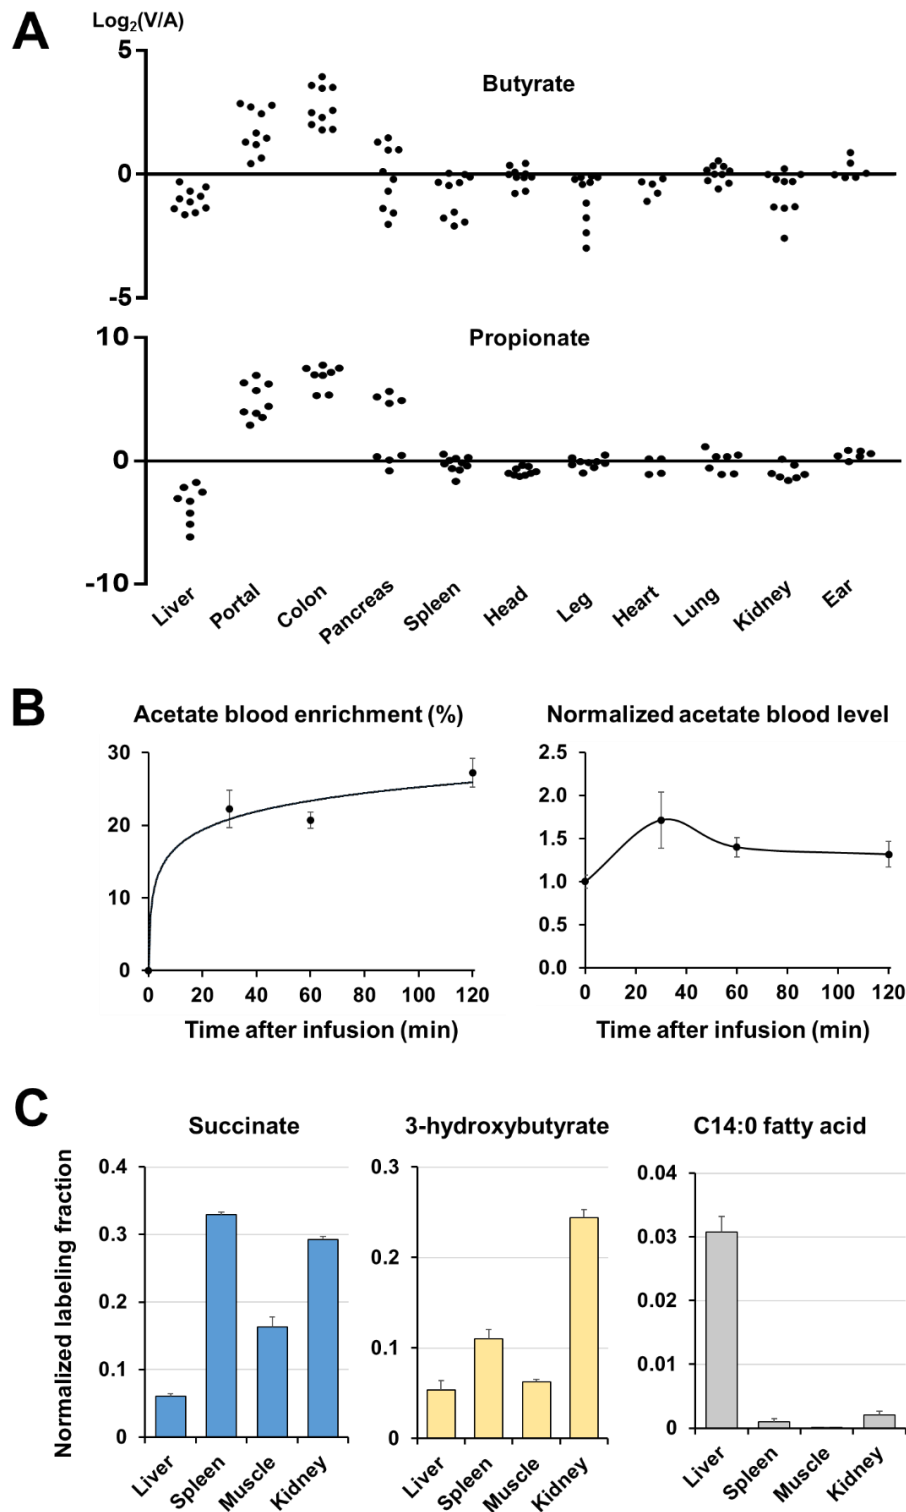

**Figure S6. Short chain fatty acid exchange in pigs (A) and steady-state infusion of a <sup>13</sup>C-acetate tracer in mice (B and C).** Data are means and error bars are standard errors (N = 3 mice). Related to Fig. 5.

| Metabolites                            | Produced                                      | Consumed                                      |
|----------------------------------------|-----------------------------------------------|-----------------------------------------------|
| Secondary bile acids                   | Intestine, Colon                              | Liver                                         |
| Acetate                                | Intestine, Colon, Head                        | Liver, Spleen, Leg                            |
| Butyrate, Propionate                   | Intestine, Colon                              | Liver                                         |
| Ribonucleosides                        | Spleen                                        | Kidneys                                       |
| Deoxyribonucleosides                   | Colon, Spleen                                 | Kidneys                                       |
| Glucose                                | Liver, Kidneys                                | Intestine, Colon, Pancreas, Spleen, Head, Leg |
| Lactate                                | Spleen, Ear                                   | Liver, Kidneys                                |
| Pyruvate                               | Pancreas, Spleen                              | Heart                                         |
| 3-hydroxybutyrate                      | Colon                                         | Leg, Lung, Kidneys                            |
| Acetoacetate                           | Liver                                         | Pancreas, Spleen, Leg, Lung, Kidneys          |
| Malate, Fumarate, $\alpha$ -KG         | Intestine, Colon, Pancreas, Spleen, Leg, Ear  | Liver, Kidneys                                |
| Succinate                              | Intestine, Colon, Pancreas, Leg               | Liver, Kidneys                                |
| Citrate                                | Pancreas, Head, Leg                           | Kidneys                                       |
| Indole metabolites                     | Intestine, Colon                              | Kidneys                                       |
| Taurine                                | Liver, Spleen, Ear                            | -                                             |
| Inositol                               | Liver, Spleen                                 | Kidneys                                       |
| Serine                                 | Kidneys, Liver                                | Intestine, Pancreas, Head, Leg, Ear           |
| Aspartate                              | Liver, Spleen                                 | Leg, Kidneys                                  |
| Asparagine                             | Spleen                                        | Intestine, Pancreas                           |
| Glutamate                              | Liver, Heart                                  | Intestine, Pancreas, Head, Leg, Kidneys       |
| Glutamine                              | Leg                                           | Intestine, Pancreas, Lung, Kidneys            |
| Alanine                                | Leg                                           | Colon                                         |
| Branched-chain amino acids             | Liver                                         | Intestine, Leg                                |
| Other essential amino acids            | Liver, Kidneys                                | Intestine, Pancreas                           |
| Branched-chain $\alpha$ -keto acids    | Leg                                           | Intestine, Colon, Spleen                      |
| Branched-chain $\alpha$ -hydroxy acids | Leg                                           | Kidneys                                       |
| N-acetyl-amino acids                   | Liver, Spleen                                 | Kidneys                                       |
| Unsaturated fatty acids (C14-C20)      | Intestine, Colon, Pancreas, Spleen, Head, Leg | Liver, Heart                                  |
| Unsaturated fatty acids (C22)          | Intestine, Spleen, Leg                        | Liver, Heart                                  |
| Unsaturated fatty acids (C24)          | Spleen                                        | Liver, Heart                                  |
| Saturated fatty acids (C14-C20)        | -                                             | Heart                                         |
| Saturated fatty acids (C22-C24)        | -                                             | Head, Leg, Lung                               |
| Carnitine                              | -                                             | Intestine, Colon, Spleen                      |
| Short-chain carnitines (C2-C5)         | Colon, Heart                                  | Spleen, Leg, Kidneys                          |
| Medium-chain carnitines (C6-C12)       | Pancreas, Leg                                 | Kidneys                                       |
| Long-chain carnitines (C14-C20)        | Intestine, Pancreas, Leg, Ear                 | Heart, Kidneys                                |

**Table S1. Sources and sinks of metabolites (continued).** Related to Fig. 1.

| Metabolites               | Produced                        | Consumed                                         |
|---------------------------|---------------------------------|--------------------------------------------------|
| Nicotinamide              | Spleen                          | Leg, Colon                                       |
| Ornithine, Citrulline     | Intestine                       | Spleen, Leg, Kidneys                             |
| Creatine                  | Liver, Heart                    | Intestine, Leg                                   |
| Creatinine                | Liver, Leg                      | Intestine, Colon, Kidneys                        |
| D-gluconate               | Colon, Pancreas, Spleen, Brain  | Leg                                              |
| Allantoin                 | Liver                           | Intestine, Colon, Pancreas, Spleen, Kidneys, Ear |
| Allantoate                | Kidneys                         | Head                                             |
| Benzoic acid              | Colon, Ear                      | -                                                |
| Biotin                    | Spleen, Heart                   | Intestine, Kidneys                               |
| Capryloyl glycine         | Liver, Pancreas                 | Kidneys                                          |
| Carnosine                 | Liver                           | Kidneys, Ear                                     |
| Citramalic acid           | Colon, Pancreas, Head, Leg      | Liver, Kidneys                                   |
| Dihydroxymandelic acid    | Intestine, Colon                | Spleen, Head, Kidneys                            |
| Gluconolactone            | Brain                           | -                                                |
| Glycerate                 | Liver, Lung                     | Kidneys                                          |
| Glycerol-3-phosphate      | Liver, Pancreas, Spleen         | Leg, Kidneys                                     |
| Glycyl-L-proline          | Leg                             | -                                                |
| Guanine                   | Spleen, Leg, Ear                | Kidneys                                          |
| Glycocyamine              | Kidneys                         | Liver                                            |
| Homocysteine              | Liver                           | Intestine, Colon                                 |
| Homogentisic acid         | Liver, Leg                      | Kidneys                                          |
| Hypotaurine               | Colon, Spleen, Leg, Heart       | Liver                                            |
| L-Threonic acid           | Liver, Lung                     | Kidneys                                          |
| m-Coumaric acid           | Intestine, Colon                | Brain                                            |
| Methylcysteine            | Liver                           | Intestine, Colon                                 |
| Methylmalonic acid        | Intestine, Colon, Pancreas, Leg | Liver, Kidneys                                   |
| m-Hydroxyhippuric acid    | Liver                           | Leg, Kidneys, Ear                                |
| N-Tiglylglycine           | Liver, Spleen                   | Kidneys                                          |
| O-Phosphorylethanolamine  | Pancreas, Spleen                | Leg, Kidneys                                     |
| Phenol sulphate           | Liver                           | Intestine, Colon, Pancreas, Spleen, Kidneys      |
| Phenylacetate             | Intestine, Colon, Kidneys       | Liver                                            |
| Phenylpropionylglycine    | Lung                            | Leg, Kidneys                                     |
| Propionyl-glycine         | Liver                           | Intestine, Colon, Pancreas, Spleen, Leg, Kidneys |
| S-methyl-5'-thioadenosine | Pancreas                        | Kidneys                                          |
| Synephrine                | Colon, Head                     | Liver, Leg, Kidneys                              |

**Table S1. Sources and sinks of metabolites (continued).** Related to Fig. 1.



| Metabolites                     | Produced                                 | Consumed                                  |
|---------------------------------|------------------------------------------|-------------------------------------------|
| Thymine                         | Intestine, Colon, Pancreas, Spleen, Head | Liver, Kidneys                            |
| Triethanolamine                 | Liver                                    | Leg, Kidneys                              |
| Uracil                          | Leg                                      | Kidneys                                   |
| Uric acid                       | Head, Skin                               | Spleen, Kidneys                           |
| Xanthine                        | Intestine, Colon                         | Liver                                     |
| 1-methyl-histidine              | Liver                                    | Intestine, Colon, Pancreas                |
| 3-hydroxyanthranilic acid       | Liver, Lung, Ear                         | Kidneys                                   |
| 3-hydroxyphenyllactate          | Leg                                      | Kidneys                                   |
| Phenylpropionic acid            | Intestine, Colon                         | Liver, Kidneys                            |
| 2-hydroxybutyrate               | Liver, Ear                               | -                                         |
| 3-hydroxyisobutyrate            | Liver                                    | Intestine, Pancreas, Spleen, Leg, Kidneys |
| 2-Isopropylmalic acid           | Liver                                    | Colon, Head                               |
| 3-4-dihydroxyhydrocinnamic acid | Leg                                      | Kidneys                                   |
| 4-pyridoxic acid                | Liver                                    | Kidneys, Ear                              |
| 5-aminolevulinic acid           | Leg                                      | Colon, Spleen, Kidneys                    |
| Beta-aminoisobutyric acid       | Liver                                    | Intestine, Pancreas, Ear                  |
| Cinnamoylglycine                | Colon, Ear                               | Leg, Kidneys                              |
| Dehydroascorbic acid            | Spleen, Lung                             | -                                         |
| D-Galactonic acid               | Colon, Pancreas, Spleen                  | Kidneys                                   |
| Dimethylglycine                 | Liver                                    | Intestine, Colon, Spleen                  |
| 5-Hydroxylysine                 | Ear                                      | Intestine, Colon, Pancreas                |
| L-Rhamnose                      | Liver                                    | Intestine, Colon, Pancreas                |
| Pipecolic acid                  | Liver                                    | Intestine, Colon, Spleen                  |
| Sorbitol                        | Spleen, Leg, Ear                         | Kidneys                                   |
| Ureidopropionic acid            | -                                        | Liver, Kidneys                            |

**Table S1. Sources and sinks of metabolites. Related to Fig. 1.**
