# Supplementary material
Source: PubMed Central journal article supplement (PMC6726553)

Data File 2. Heat map from Fig.1G with metabolite names. Related to Figure 1.

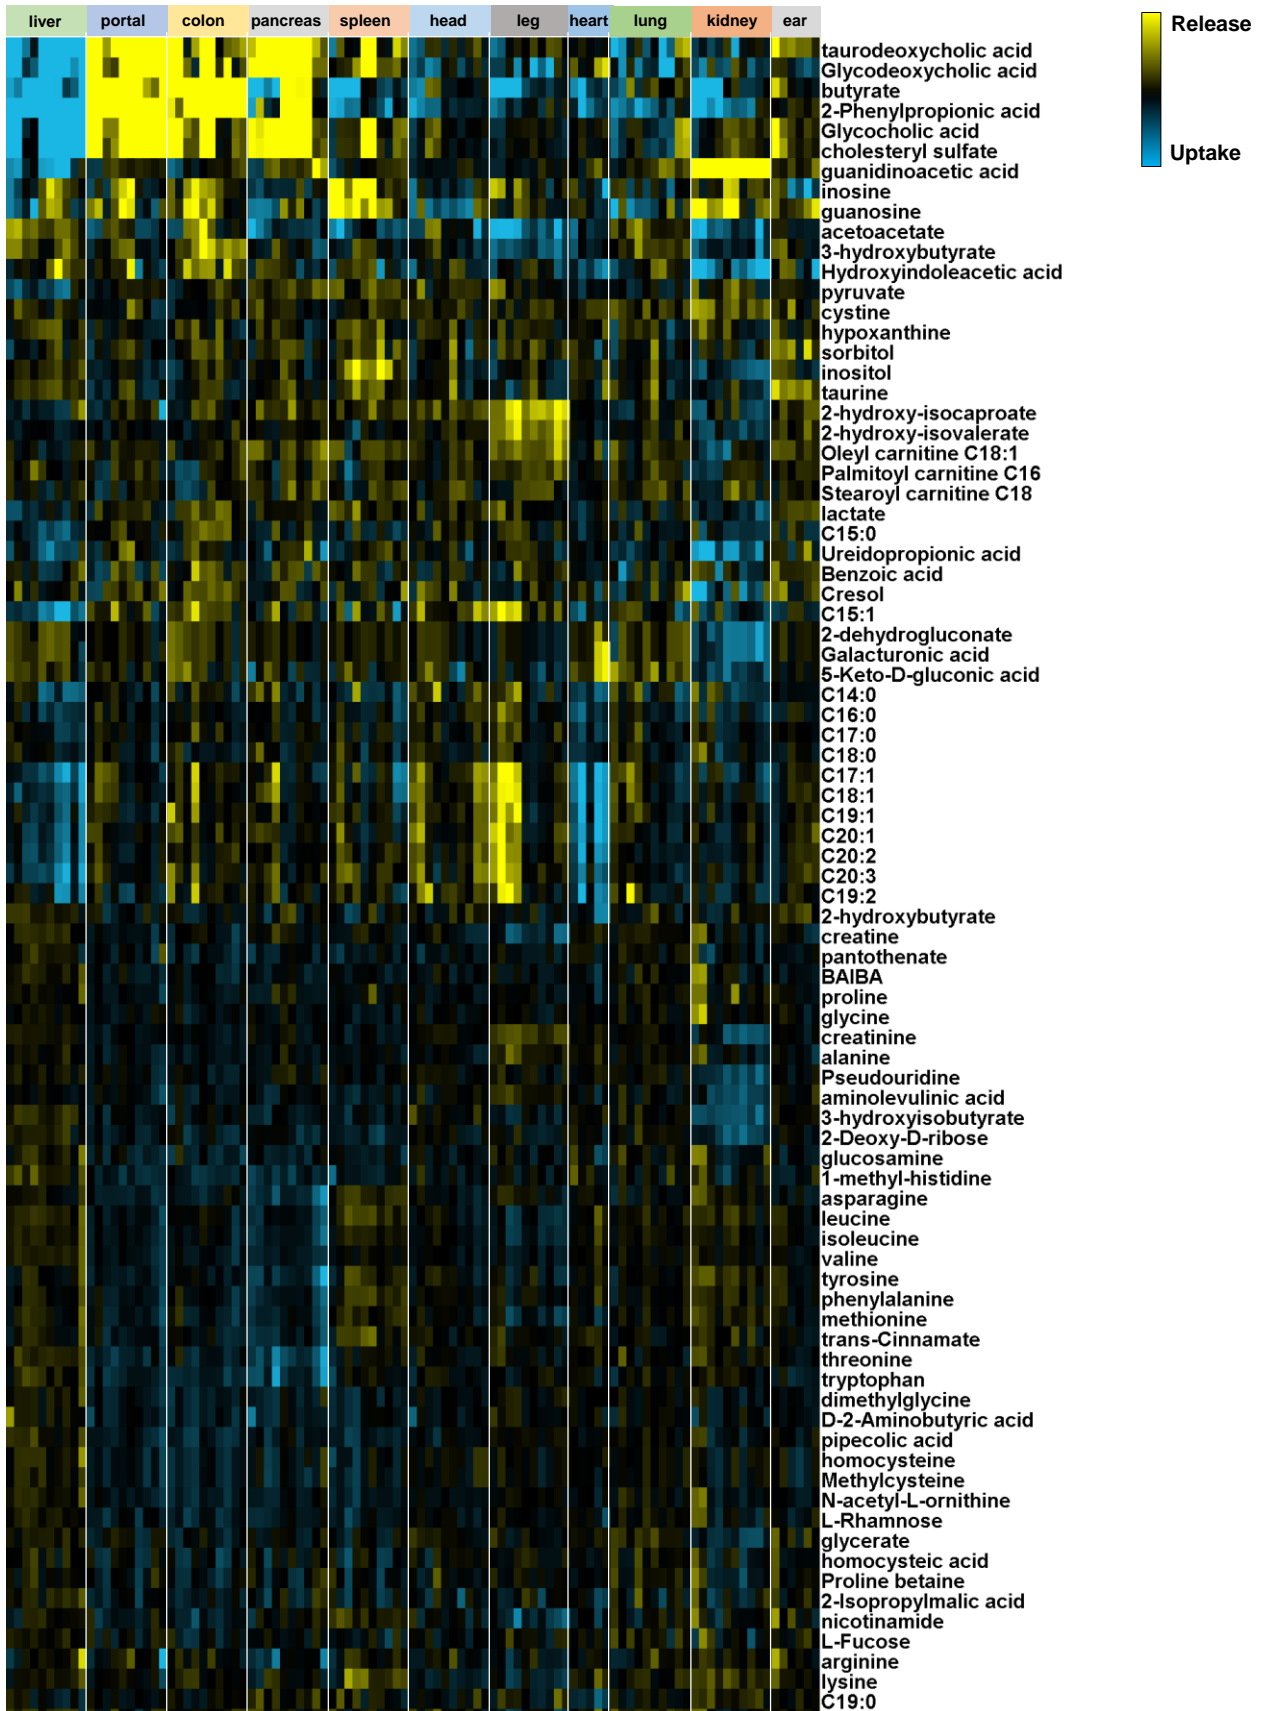



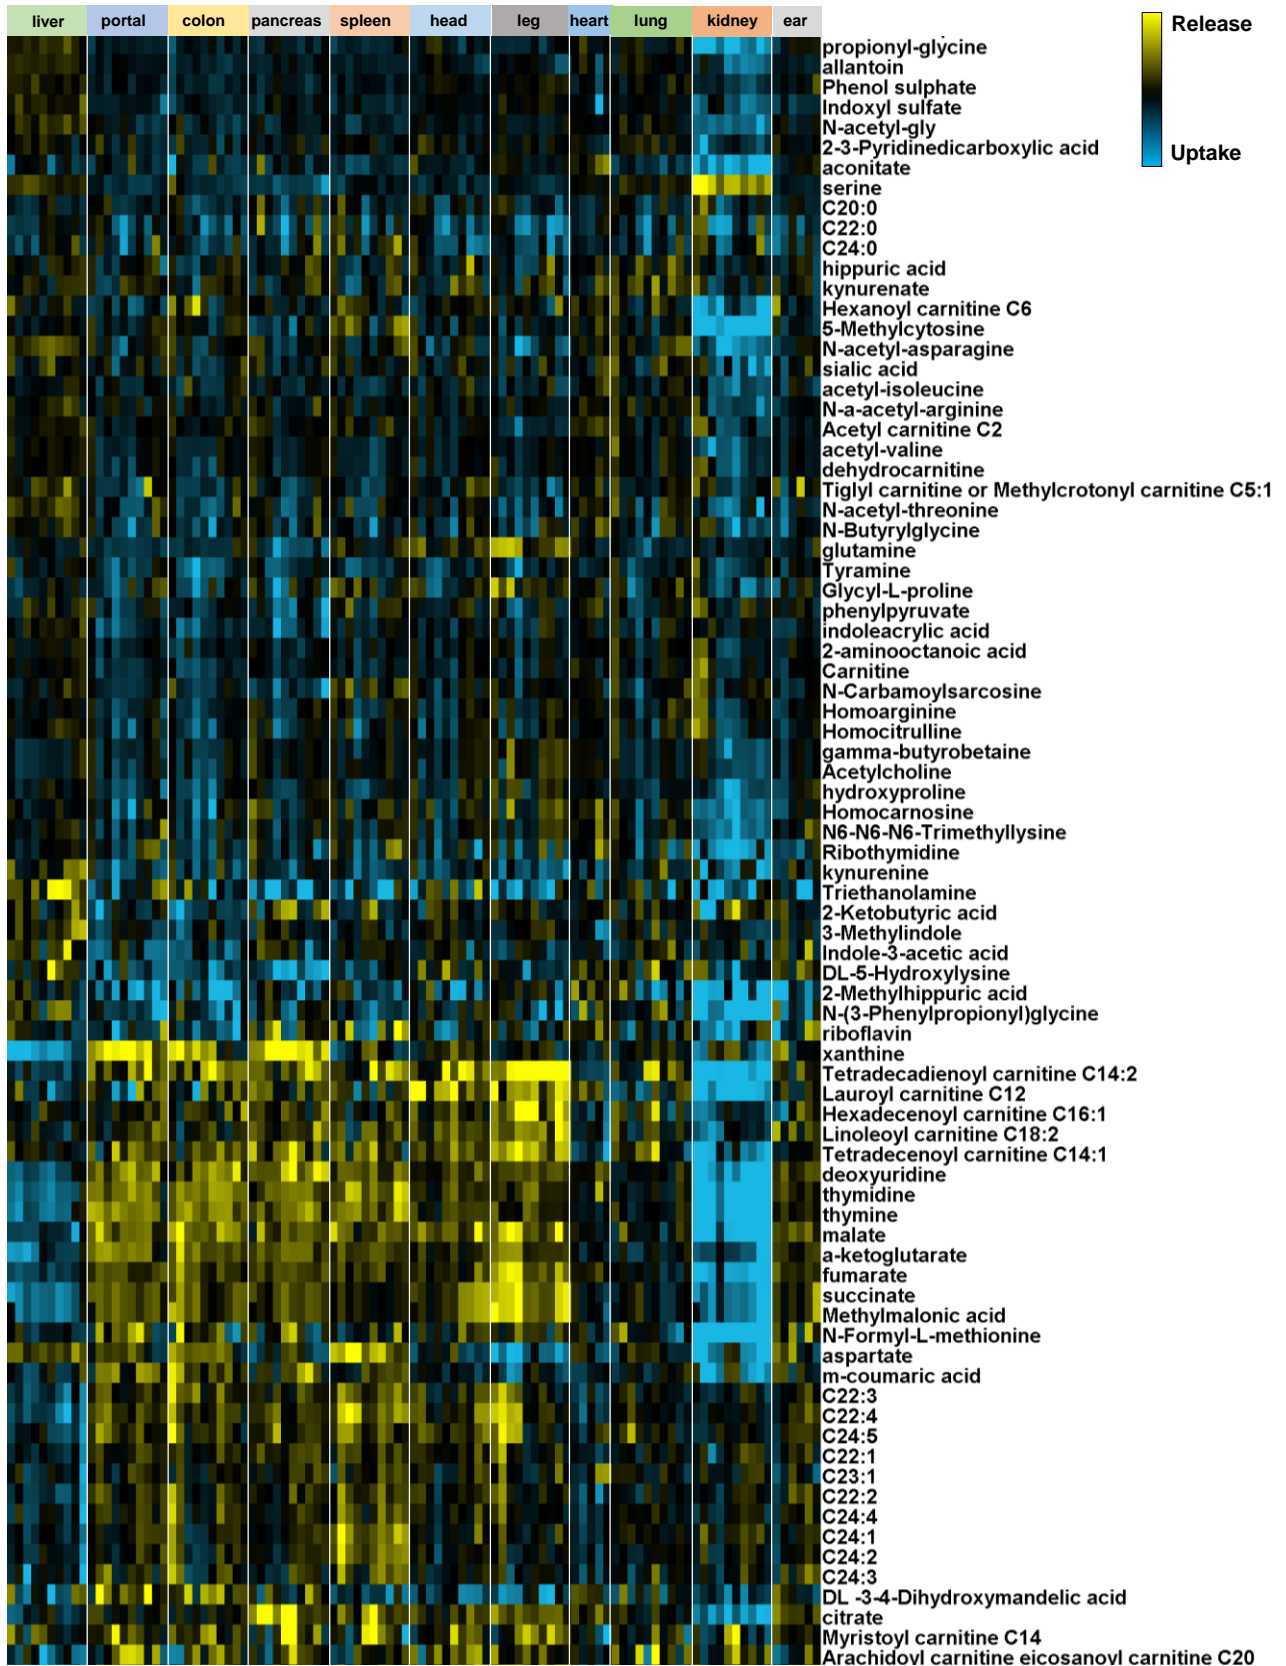

Supplement: NIHMS1533575-supplement-2.pdf [file NIHMS1533575-supplement-2.pdf]
